# Supplementary material for: A Systematic Review on the Role of Substance Consumption in Work-Related Road Traffic Crashes Reveals the Importance of Biopsychosocial Factors in Prevention
Source: MDPI journal article supplement (doi:10.3390/bs12020023), 2022-01-25
Supplement: s1 [file s1]

| <b>The Appraisal tool for Cross-Sectional Studies (AXIS tool, 2016) Part 1</b>                                                                        |                    |                        |                           |                              |           |                      |                  |
|-------------------------------------------------------------------------------------------------------------------------------------------------------|--------------------|------------------------|---------------------------|------------------------------|-----------|----------------------|------------------|
| Study                                                                                                                                                 | Asefa et al., 2015 | Bacchieri et al., 2010 | Bamberger and Cohen, 2015 | Boufous and Williamson, 2006 | Chu, 2014 | Karakus et al., 2015 | Sam et al., 2018 |
| Introduction                                                                                                                                          |                    |                        |                           |                              |           |                      |                  |
| 1. Were the aims/objectives of the study clear?                                                                                                       | YES                | YES                    | YES                       | YES                          | YES       | YES                  | YES              |
| Methods                                                                                                                                               |                    |                        |                           |                              |           |                      |                  |
| 2. Was the study design appropriate for the stated aim(s)?                                                                                            | YES                | YES                    | YES                       | YES                          | YES       | YES                  | YES              |
| 3. Was the sample size justified?                                                                                                                     | YES                | YES                    | NO                        | NO                           | NO        | NO                   | NO               |
| 4. Was the target/reference population clearly defined? (Is it clear who the research was about?)                                                     | YES                | YES                    | YES                       | YES                          | YES       | YES                  | YES              |
| 5. Was the sample frame taken from an appropriate population base so that it closely represented the target/reference population under investigation? | YES                | YES                    | YES                       | YES                          | YES       | YES                  | YES              |
| 6. Was the selection process likely to select subjects/participants that were representative of the target/reference                                  | YES                | YES                    | NO                        | YES                          | YES       | YES                  | YES              |

|                                                                                                                                                           |     |     |     |     |     |     |     |
|-----------------------------------------------------------------------------------------------------------------------------------------------------------|-----|-----|-----|-----|-----|-----|-----|
| population under investigation?                                                                                                                           |     |     |     |     |     |     |     |
| 7. Were measures undertaken to address and categorise non-responders?                                                                                     | NO  | NO  | YES | NO  | NO  | NO  | NO  |
| 8. Were the risk factor and outcome variables measured appropriate to the aims of the study?                                                              | YES | YES | YES | YES | YES | NO  | YES |
| 9. Were the risk factor and outcome variables measured correctly using instruments/ measurements that had been trialled, piloted or published previously? | YES |
| 10. Is it clear what was used to determined statistical significance and/or precision estimates? (eg, p values, CIs)                                      | YES |
| 11. Were the methods (including statistical methods) sufficiently described to enable them to be repeated?                                                | YES | YES | YES | NO  | YES | NO  | YES |
| Results                                                                                                                                                   |     |     |     |     |     |     |     |
| 12. Were the basic data adequately described?                                                                                                             | YES |

|                                                                            |     |     |     |                 |                 |                 |     |
|----------------------------------------------------------------------------|-----|-----|-----|-----------------|-----------------|-----------------|-----|
| 13. Does the response rate raise concerns about non-response bias?         | NO  | NO  | YES | NO              | NO              | NO              | YES |
| 14. If appropriate, was information about non-responders described?        | NO  | NO  | YES | NOT APPROPRIATE | NOT APPROPRIATE | NOT APPROPRIATE | NO  |
| 15. Were the results internally consistent?                                | YES | YES | YES | YES             | YES             | YES             | YES |
| 16. Were the results for the analyses described in the methods, presented? | YES | YES | YES | YES             | YES             | YES             | YES |

| <b>The Appraisal tool for Cross-Sectional Studies (AXIS tool, 2016) Part 2</b> |                        |                     |                        |                   |                     |                        |                       |
|--------------------------------------------------------------------------------|------------------------|---------------------|------------------------|-------------------|---------------------|------------------------|-----------------------|
| Study                                                                          | Smailović et al., 2019 | Thiese et al., 2015 | Thygerson et al., 2011 | Chen et al., 2020 | Konlan et al., 2020 | French and Gumus, 2021 | Mitchell et al., 2014 |
| Introduction                                                                   |                        |                     |                        |                   |                     |                        |                       |
| 1. Were the aims/objectives of the study clear?                                | YES                    | YES                 | YES                    | YES               | YES                 | YES                    | YES                   |
| Methods                                                                        |                        |                     |                        |                   |                     |                        |                       |
| 2. Was the study design appropriate for the stated aim(s)?                     | YES                    | YES                 | YES                    | YES               | YES                 | YES                    | YES                   |
| 3. Was the sample size justified?                                              | NO                     | NO                  | NO                     | NO                | YES                 | NO                     | NO                    |
| 4. Was the target/reference                                                    | YES                    | YES                 | YES                    | YES               | YES                 | YES                    | YES                   |

|                                                                                                                                                          |     |     |     |     |     |     |     |
|----------------------------------------------------------------------------------------------------------------------------------------------------------|-----|-----|-----|-----|-----|-----|-----|
| population clearly defined?<br>(Is it clear who the research was about?)                                                                                 |     |     |     |     |     |     |     |
| 5. Was the sample frame taken from an appropriate population base so that it closely represented the target/reference population under investigation?    | YES | NO  | YES | YES | YES | YES | YES |
| 6. Was the selection process likely to select subjects/participants that were representative of the target/reference population under investigation?     | YES |
| 7. Were measures undertaken to address and categorise non-responders?                                                                                    | NO  |
| 8. Were the risk factor and outcome variables measured appropriate to the aims of the study?                                                             | YES |
| 9. Were the risk factor and outcome variables measured correctly using instruments/measurements that had been trialled, piloted or published previously? | YES | NO  | YES | YES | YES | YES | YES |

|                                                                                                                      |                 |     |                 |                 |     |                 |                 |
|----------------------------------------------------------------------------------------------------------------------|-----------------|-----|-----------------|-----------------|-----|-----------------|-----------------|
| 10. Is it clear what was used to determined statistical significance and/or precision estimates? (eg, p values, CIs) | YES             | YES | YES             | YES             | YES | YES             | YES             |
| 11. Were the methods (including statistical methods) sufficiently described to enable them to be repeated?           | YES             | YES | YES             | YES             | NO  | YES             | NO              |
| Results                                                                                                              |                 |     |                 |                 |     |                 |                 |
| 12. Were the basic data adequately described?                                                                        | YES             | YES | YES             | YES             | YES | YES             | YES             |
| 13. Does the response rate raise concerns about non-response bias?                                                   | NO              | NO  | NO              | NO              | NO  | NO              | NO              |
| 14. If appropriate, was information about non-responders described?                                                  | NOT APPROPRIATE | NO  | NOT APPROPRIATE | NOT APPROPRIATE | NO  | NOT APPROPRIATE | NOT APPROPRIATE |
| 15. Were the results internally consistent?                                                                          | YES             | YES | YES             | YES             | YES | YES             | YES             |
| 16. Were the results for the analyses described in the methods, presented?                                           | YES             | YES | YES             | YES             | YES | YES             | YES             |

| <b>The Appraisal tool for Cross-Sectional Studies (AXIS tool, 2016) Part 3</b>                                                                        |                  |                     |                      |                         |                       |            |                |
|-------------------------------------------------------------------------------------------------------------------------------------------------------|------------------|---------------------|----------------------|-------------------------|-----------------------|------------|----------------|
| Study                                                                                                                                                 | Poku et al.,2020 | Brodie et al., 2009 | Holizki et al., 2015 | Lambrechts et al., 2019 | Rudisill et al., 2019 | Yuan, 2021 | Li et al.,2020 |
| Introduction                                                                                                                                          |                  |                     |                      |                         |                       |            |                |
| 1. Were the aims/objectives of the study clear?                                                                                                       | YES              | YES                 | YES                  | YES                     | YES                   | YES        | YES            |
| Methods                                                                                                                                               |                  |                     |                      |                         |                       |            |                |
| 2. Was the study design appropriate for the stated aim(s)?                                                                                            | YES              | YES                 | YES                  | YES                     | YES                   | YES        | YES            |
| 3. Was the sample size justified?                                                                                                                     | YES              | NO                  | NO                   | NO                      | NO                    | NO         | NO             |
| 4. Was the target/reference population clearly defined? (Is it clear who the research was about?)                                                     | YES              | YES                 | YES                  | YES                     | YES                   | YES        | YES            |
| 5. Was the sample frame taken from an appropriate population base so that it closely represented the target/reference population under investigation? | YES              | YES                 | YES                  | NO                      | YES                   | YES        | YES            |
| 6. Was the selection process likely to select subjects/participants that were representative of the target/reference population under investigation?  | YES              | YES                 | YES                  | YES                     | YES                   | YES        | YES            |
| 7. Were measures undertaken to address and categorise non-responders?                                                                                 | NO               | NO                  | YES                  | NO                      | YES                   | NO         | NO             |

|                                                                                                                                                           |     |                 |     |     |     |                 |                 |
|-----------------------------------------------------------------------------------------------------------------------------------------------------------|-----|-----------------|-----|-----|-----|-----------------|-----------------|
| 8. Were the risk factor and outcome variables measured appropriate to the aims of the study?                                                              | YES | YES             | YES | YES | YES | YES             | YES             |
| 9. Were the risk factor and outcome variables measured correctly using instruments/ measurements that had been trialled, piloted or published previously? | YES | YES             | YES | YES | YES | YES             | YES             |
| 10. Is it clear what was used to determined statistical significance and/or precision estimates? (eg, p values, CIs)                                      | YES | NO              | YES | YES | YES | YES             | YES             |
| 11. Were the methods (including statistical methods) sufficiently described to enable them to be repeated?                                                | NO  | NO              | YES | YES | YES | YES             | YES             |
| Results                                                                                                                                                   |     |                 |     |     |     |                 |                 |
| 12. Were the basic data adequately described?                                                                                                             | YES | YES             | YES | YES | YES | YES             | YES             |
| 13. Does the response rate raise concerns about non-response bias?                                                                                        | NO  | NO              | YES | YES | YES | NO              | NO              |
| 14. If appropriate, was information about non-responders described?                                                                                       | NO  | NOT APPROPRIATE | YES | NO  | NO  | NOT APPROPRIATE | NOT APPROPRIATE |
| 15. Were the results internally consistent?                                                                                                               | YES | YES             | YES | YES | YES | YES             | YES             |

|                                                                            |     |     |     |     |     |     |     |
|----------------------------------------------------------------------------|-----|-----|-----|-----|-----|-----|-----|
| 16. Were the results for the analyses described in the methods, presented? | YES |
|----------------------------------------------------------------------------|-----|-----|-----|-----|-----|-----|-----|

| <b>The Appraisal tool for Cross-Sectional Studies (AXIS tool, 2016) Part 4</b>                    |                            |                              |                              |                              |                        |                           |                               |                                  |                            |
|---------------------------------------------------------------------------------------------------|----------------------------|------------------------------|------------------------------|------------------------------|------------------------|---------------------------|-------------------------------|----------------------------------|----------------------------|
| Study                                                                                             | <b>Liu &amp; Fan, 2020</b> | <b>Papali a et al., 2012</b> | <b>Bourdeau et al., 2021</b> | <b>McNeilly et al., 2010</b> | <b>Qi et al., 2013</b> | <b>Gates et al., 2013</b> | <b>Wadsworth et al., 2006</b> | <b>Khoshakhlagh et al., 2019</b> | <b>Reguly et al., 2014</b> |
| Introduction                                                                                      |                            |                              |                              |                              |                        |                           |                               |                                  |                            |
| 1. Were the aims/objectives of the study clear?                                                   | YES                        | YES                          | YES                          | YES                          | YES                    | YES                       | YES                           | YES                              | YES                        |
| Methods                                                                                           |                            |                              |                              |                              |                        |                           |                               |                                  |                            |
| 2. Was the study design appropriate for the stated aim(s)?                                        | YES                        | YES                          | YES                          | YES                          | YES                    | YES                       | YES                           | YES                              | YES                        |
| 3. Was the sample size justified?                                                                 | NO                         | NO                           | NO                           | NO                           | NO                     | NO                        | NO                            | NO                               | NO                         |
| 4. Was the target/reference population clearly defined? (Is it clear who the research was about?) | YES                        | YES                          | YES                          | YES                          | YES                    | YES                       | NO                            | YES                              | YES                        |





|                                                                                                                      |                 |     |                 |                 |     |                 |     |     |                 |
|----------------------------------------------------------------------------------------------------------------------|-----------------|-----|-----------------|-----------------|-----|-----------------|-----|-----|-----------------|
| correctly using instruments/ measurements that had been trialled, piloted or published previously?                   |                 |     |                 |                 |     |                 |     |     |                 |
| 10. Is it clear what was used to determined statistical significance and/or precision estimates? (eg, p values, CIs) | YES             | YES | YES             | NO              | YES | YES             | YES | YES | YES             |
| 11. Were the methods (including statistical methods) sufficiently described to enable them to be repeated?           | YES             | NO  | YES             | NO              | YES | YES             | YES | NO  | YES             |
| Results                                                                                                              |                 |     |                 |                 |     |                 |     |     |                 |
| 12. Were the basic data adequately described?                                                                        | YES             | YES | YES             | YES             | YES | YES             | YES | YES | YES             |
| 13. Does the response rate raise concerns about non-response bias?                                                   | NO              | NO  | NO              | NO              | YES | NO              | NO  | NO  | NO              |
| 14. If appropriate, was information about non-                                                                       | NOT APPROPRIATE | NO  | NOT APPROPRIATE | NOT APPROPRIATE | YES | NOT APPROPRIATE | NO  | NO  | NOT APPROPRIATE |

[illegible]
