# Supplementary material for: A Systematic Review on the Role of Substance Consumption in Work-Related Road Traffic Crashes Reveals the Importance of Biopsychosocial Factors in Prevention
Source: MDPI journal article supplement (doi:10.3390/bs12020023), 2022-01-25
Supplement: s1 [file s1]

| Database | Steps | Query                                                                                                                                                                                                                                                                                                                                                                                                                                                                                                                                                                                                                         | Research in              | Items found |
|----------|-------|-------------------------------------------------------------------------------------------------------------------------------------------------------------------------------------------------------------------------------------------------------------------------------------------------------------------------------------------------------------------------------------------------------------------------------------------------------------------------------------------------------------------------------------------------------------------------------------------------------------------------------|--------------------------|-------------|
| PubMed   | #1    | alcohol OR amphetamine OR analgesic OR antidepressant OR antihistamine OR anxiolytic OR BAC OR barbiturate OR benzodiazepine OR cannabinoid OR cannabis OR cocaine OR drink OR drink-drive OR drink-driving OR “drinking AND driving” OR “driving under the influence” OR “driving while intoxicated” OR “driving while intoxicated” OR drug OR drunk OR drunk driving OR drunk-driving OR DUI OR DUID OR ethanol OR heroin OR hypnotic OR intoxicated OR medication OR narcotic OR opiate OR opioid OR polypharmacy OR psychoactive OR psychostimulant OR psychotropic OR sedative OR stimulant OR substance OR tranquilizer | Title/Abstract           | 2180247     |
|          | #2    | bus OR “business driver” OR “commercial driver” OR commuting OR “company car” OR “delivery worker” OR “emergency vehicle” OR “grey fleet” OR “heavy commercial” OR vehicle OR itinere OR job OR “light commercial vehicle” OR lorry OR “occupational driver” OR “private car” OR “professional driver” OR “public transport vehicle” OR taxi OR trailer OR transport OR transportation OR truck OR work OR workplace OR work-place OR work-related                                                                                                                                                                            | Title/Abstract           | 1553034     |
|          | #3    | accident OR blameworthiness OR collision OR crash OR crashes OR culpability OR death OR fatalities OR fatality OR incident OR injuries OR injury OR “near miss” OR “road risk”                                                                                                                                                                                                                                                                                                                                                                                                                                                | Title/Abstract           | 1709287     |
|          | #4    | Combine #1 AND #2 AND #3                                                                                                                                                                                                                                                                                                                                                                                                                                                                                                                                                                                                      |                          | 8897        |
|          | #5    | Limit to (English) and (Italian)                                                                                                                                                                                                                                                                                                                                                                                                                                                                                                                                                                                              |                          | 8460        |
|          | #6    | Limit to (year 2006- year 2021)                                                                                                                                                                                                                                                                                                                                                                                                                                                                                                                                                                                               |                          | 6594        |
| Scopus   | #1    | alcohol OR amphetamine OR analgesic OR antidepressant OR antihistamine OR anxiolytic OR BAC OR barbiturate OR benzodiazepine OR cannabinoid OR cannabis OR cocaine OR drink OR drink-drive OR drink-driving OR “drinking AND driving” OR “driving under the influence” OR “driving while intoxicated” OR “driving while intoxicated” OR drug OR drunk OR drunk driving OR drunk-driving OR DUI OR DUID OR ethanol OR heroin OR hypnotic OR intoxicated OR medication OR narcotic OR opiate OR opioid OR polypharmacy OR psychoactive OR psychostimulant OR psychotropic OR sedative OR stimulant OR substance OR tranquilizer | Title/Abstract/ Keywords | 10408145    |
|          | #2    | bus OR “business driver” OR “commercial driver” OR commuting OR “company car” OR “delivery worker” OR “emergency vehicle” OR “grey fleet” OR “heavy                                                                                                                                                                                                                                                                                                                                                                                                                                                                           | Title/Abstract/ Keywords | 210147      |

|  |    |                                                                                                                                                                                                                                                                                                |                             |         |
|--|----|------------------------------------------------------------------------------------------------------------------------------------------------------------------------------------------------------------------------------------------------------------------------------------------------|-----------------------------|---------|
|  |    | commercial" OR vehicle OR itinere OR job OR "light commercial vehicle" OR lorry OR "occupational driver" OR "private car" OR "professional driver" OR "public transport vehicle" OR taxi OR trailer OR transport OR transportation OR truck OR work OR workplace OR work-place OR work-related |                             |         |
|  | #3 | accident OR blameworthiness OR collision OR crash OR crashes OR culpability OR death OR fatalities OR fatality OR incident OR injuries OR injury OR "near miss" OR "road risk"                                                                                                                 | Title/Abstract/<br>Keywords | 4096890 |
|  | #4 | Combine #1 AND #2 AND #3                                                                                                                                                                                                                                                                       |                             | 881     |
|  | #5 | Limit to (English) and (Italian)                                                                                                                                                                                                                                                               |                             | 790     |
|  | #6 | Limit to (from year 2006 to year 2021)                                                                                                                                                                                                                                                         |                             | 519     |

**TABLE 2** | Study research
